# Supplementary material for: Ferroportin inhibitor vamifeport ameliorates ineffective erythropoiesis in a mouse model of b-thalassemia with blood transfusions
Source: PubMed Central journal article supplement — Haematologica. 2023 May 11;108(10):2703–14. doi: 10.3324/haematol.2022.282328 (PMC10543196; doi:10.3324/haematol.2022.282328), 2023-05-11

# Ferroportin inhibitor vamifeport ameliorates ineffective erythropoiesis in a mouse model of $\beta$ -thalassemia with blood transfusions

Natarajaswamy Kalleda, Anna Flace, Patrick Altermatt, Giada Ingoglia,<sup>°</sup> Cédric Doucerain,<sup>°</sup> Naja Nyffenegger, Franz Dürrenberger and Vania Manolova

Research and Non-clinical Development, CSL Vifor, St. Gallen, Switzerland

<sup>°</sup>GI current address: Avelo AG, Schlieren, Switzerland.

<sup>°</sup>CD current address: Anjarium Biosciences, Zurich, Switzerland.

**Correspondence:** N. Kalleda  
[natarajaswamy.kalleda@viforpharma.com](mailto:natarajaswamy.kalleda@viforpharma.com)

**Received:** October 28, 2022.

**Accepted:** May 4, 2023.

**Early view:** May 11, 2023.

<https://doi.org/10.3324/haematol.2022.282328>

Published under a CC BY license 

## SUPPLEMENTAL MATERIAL

**Figure S1. NTBI levels in  $Hbb^{th3/+}$  mice after vamifeport treatment alone or in combination with repeated blood transfusions.** Representative scatter plot of individual values (with mean and standard deviation) showing the effects of transfusion, vehicle, and vamifeport treatment at the end of the study. NTBI, non-transferrin-bound iron; WT, wild-type. There were no significant differences for statistical comparisons between any treatment group and the  $Hbb^{th3/+}$  vehicle non-transfused group or the vehicle transfused group.

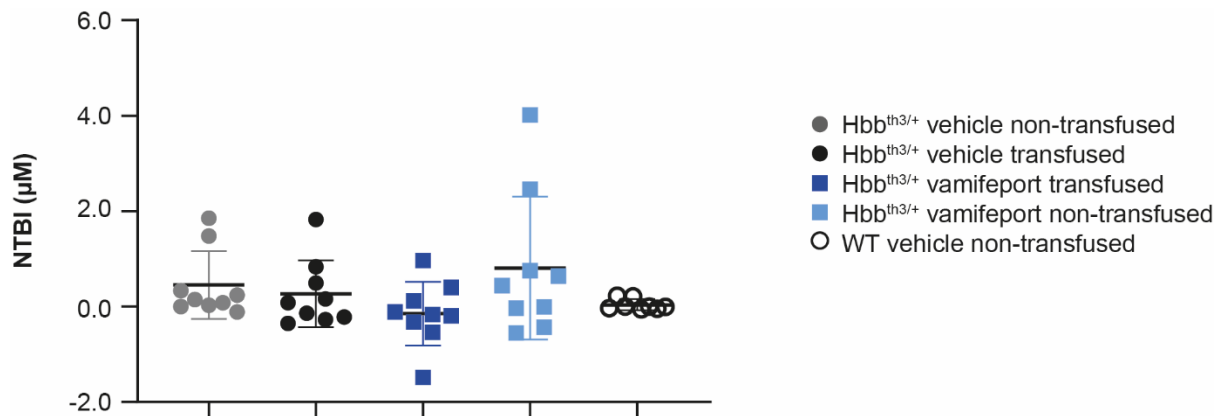

**Figure S2. Spleen weight, spleen iron and *Erfe* expression in *Hbb<sup>th3/+</sup>* mice after vamifeport treatment alone or in combination with repeated blood transfusions.**

Representative scatter plots of individual values (with mean and standard deviation) showing the effects of transfusion, vehicle, and vamifeport treatment at the end of the study on **A**. Relative spleen weight, **B**. Spleen iron content, **C**. Spleen iron concentration, **D**. *Erfe* expression. *Erfe*, erythroferrone; WT, wild-type. Significant differences compared with the *Hbb<sup>th3/+</sup>* vehicle non-transfused group (black) and vehicle transfused group (purple) are indicated as: \* $p < 0.05$ ,

\*\* $p < 0.01$ , and \*\*\* $p < 0.001$ .

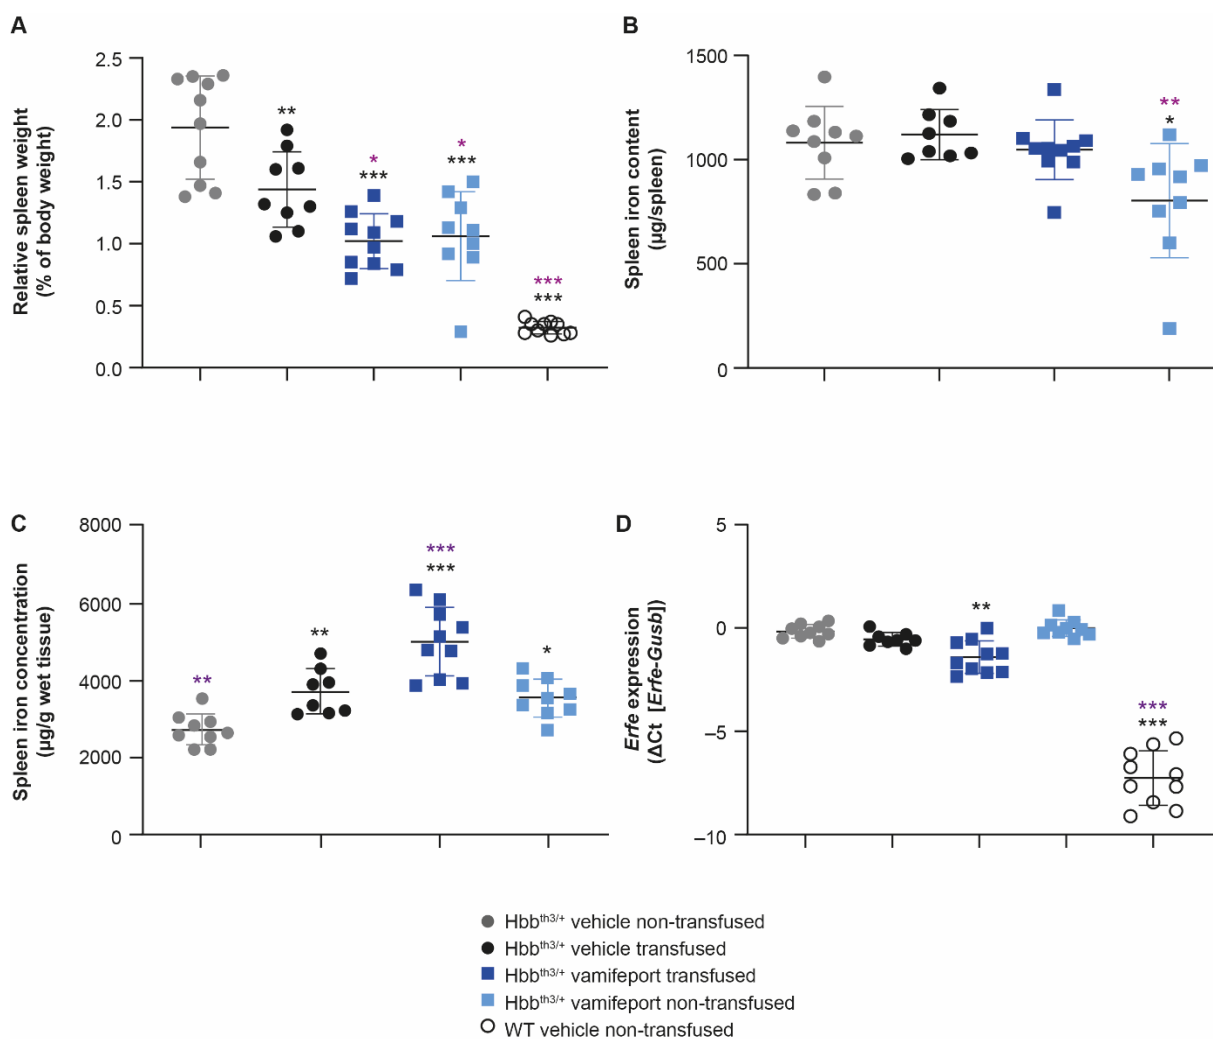

**Figure S3. Liver, heart, and kidney iron concentration in Hbb<sup>th3/+</sup> mice after vamifeport treatment alone or in combination with repeated blood transfusions.** Representative scatter plots of individual values (with mean and standard deviation) showing the effects of transfusion, vehicle, and vamifeport treatment at the end of the study on total **A. Liver iron, B. Heart iron, C. Kidney iron.** WT, wild-type. Significant differences compared with the Hbb<sup>th3/+</sup> vehicle non-transfused group (black) and vehicle transfused group (purple) are indicated as: \*p<0.05, \*\*p<0.01, and \*\*\*p<0.001.

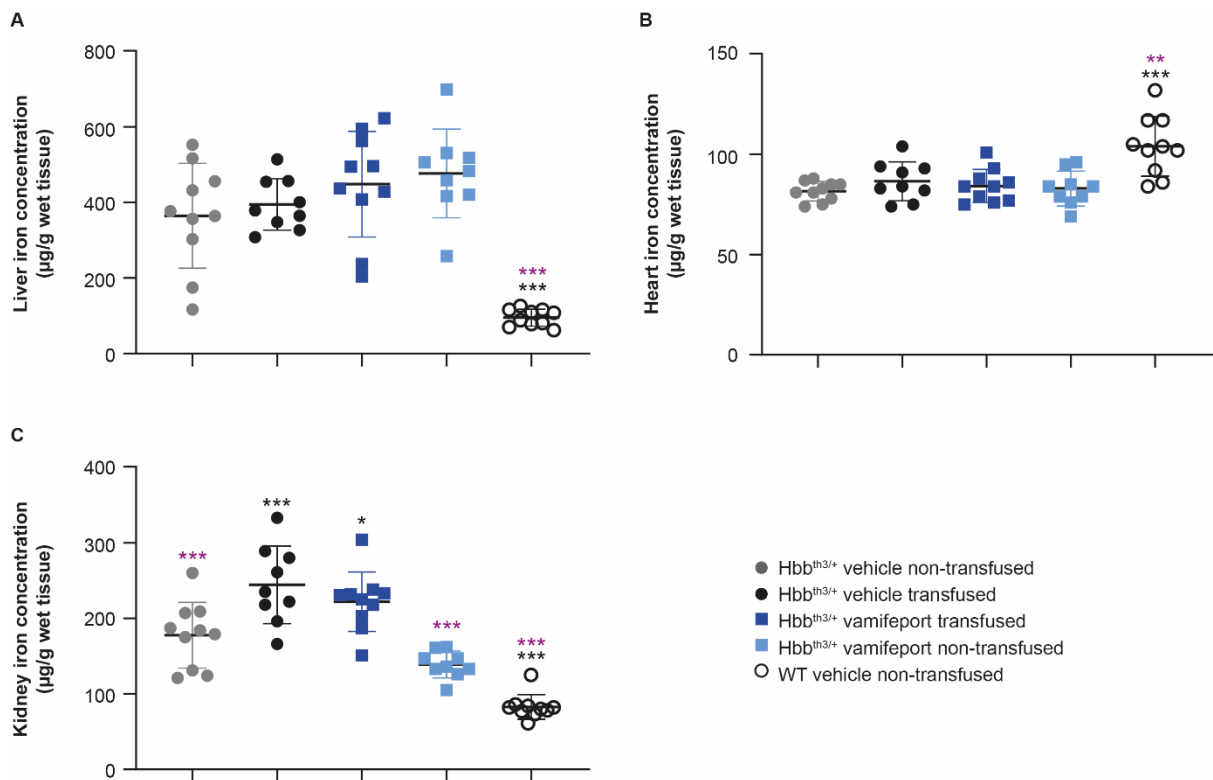

Supplement: 2022_282328_KALLEDA_SUPPL.pdf [file 2022_282328_KALLEDA_SUPPL.pdf]
